# Supplementary material for: Five-Feature Model for Developing the Classifier for Synergistic vs. Antagonistic Drug Combinations Built by XGBoost
Source: Front Genet. 2019 Jul 9;10:600. doi: 10.3389/fgene.2019.00600 (PMC6629777; doi:10.3389/fgene.2019.00600)
Supplement: TABLE S9 — Accuracy of the 14 overlapped drug pairs in 38 cell lines in DeepSynergy and in validation set-2. [file Table_9.XLSX]

## Sheet: Sheet1
Supplementary Table S9. Accuracy of the 14 overlapped drug pairs in 38 cell lines in Deepsynergy and in validation set-2
Data Source	Accuracy
Validation set-2	1
A375	0.214286
PA1	0.0714286
A2780	0.428571
NCIH23	0.0714286
CAOV3	0.571429
HT144	0.714286
VCAP	0.714286
OCUBM	0.571429
SKMEL30	0.571429
OVCAR3	0.214286
ES2	0.428571
A2058	0.0714286
OV90	0.285714
COLO320DM	0.857143
RKO	0.571429
NCIH2122	0.428571
NCIH460	0.571429
SKOV3	0.357143
NCIH1650	0.5
NCIH520	0.0714286
T47D	0.214286
LOVO	0.357143
HCT116	0.357143
MSTO	0.428571
UWB1289BRCA1	0.642857
SW837	0.5
UACC62	0.571429
ZR751	0.571429
UWB1289	0.642857
SW620	0.571429
KPL1	0.571429
MDAMB436	0.571429
EFM192B	0.285714
A427	0.285714
LNCAP	0.214286
DLD1	0.571429
SKMES1	0.285714
HT29	0.642857
